# Supplementary material for: Induction of Senescence by Loss of Gata4 in Cardiac Fibroblasts
Source: MDPI journal article supplement (doi:10.3390/cells12121652), 2023-06-17
Supplement: s1 [file s1]

## Supplementary Materials

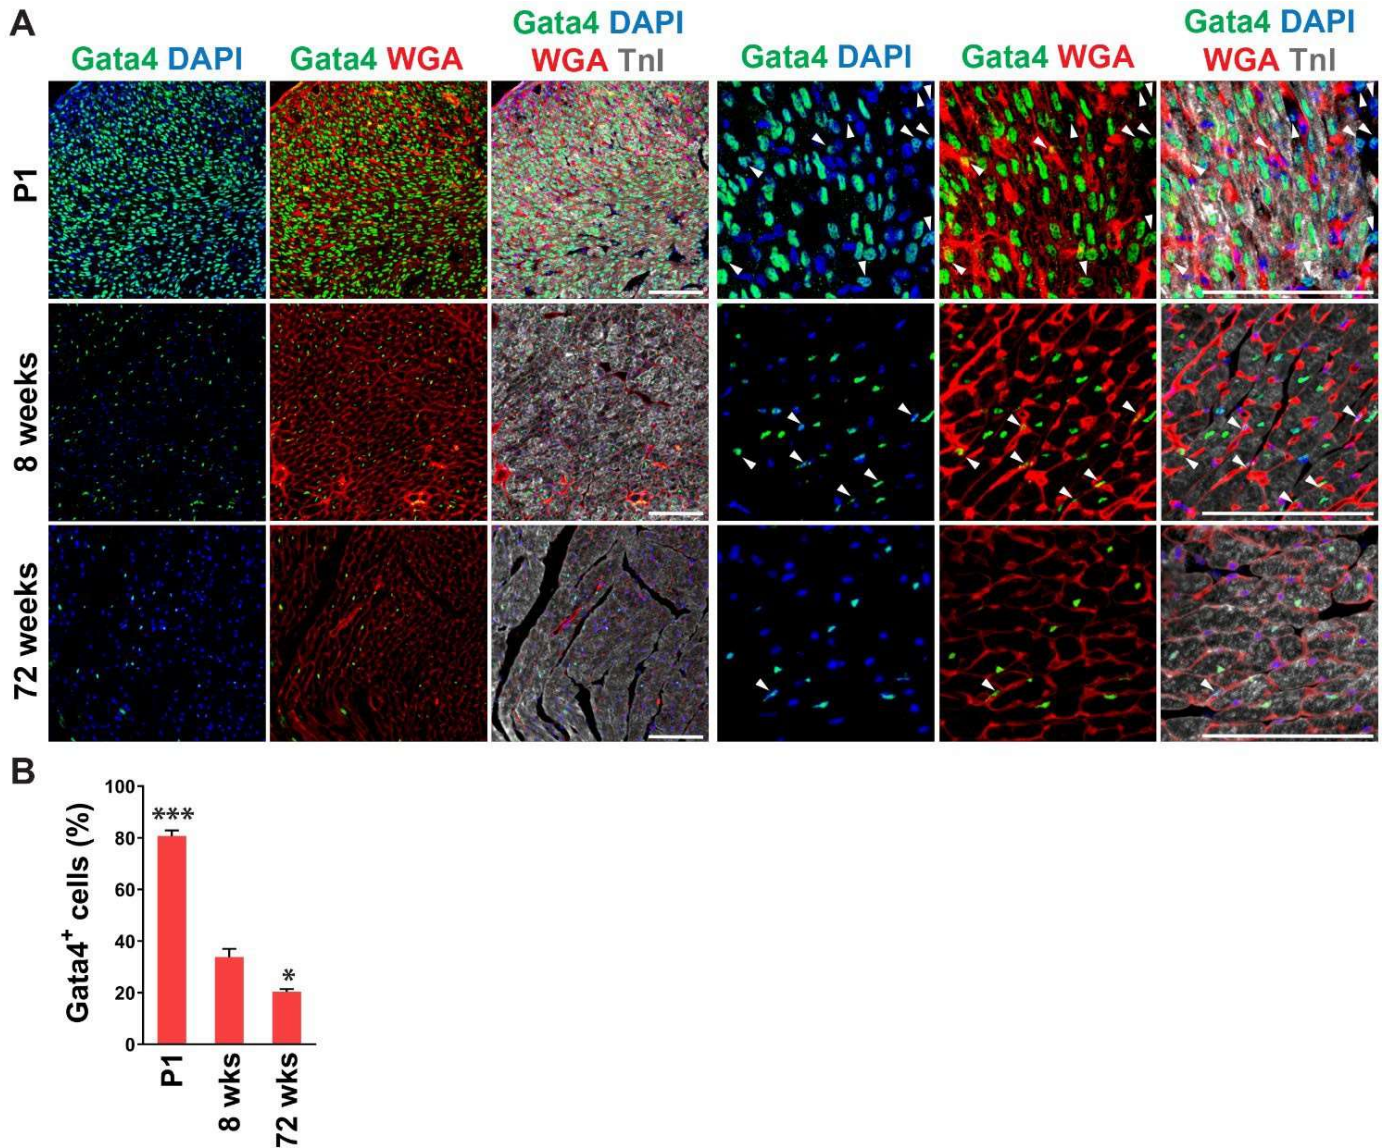

**Supplementary Figure S1.** Temporal expression pattern of Gata4 in the heart. **(A)** The number of Gata4-expressing cells decreases in the aged heart. Heart sections from different ages of mice, including P1, 8 weeks, and 72 weeks old, were immunostained for Gata4 and Troponin I (Tnl), along with wheat germ agglutinin (WGA) staining to demarcate cell boundaries. White arrowheads indicate Gata4<sup>+</sup> interstitial cells in WGA stained interstitial area. Gata4<sup>+</sup>Troponin I<sup>+</sup> cells surrounded by WGA staining indicate Gata4<sup>+</sup> cardiomyocytes. Scale bar, 100  $\mu$ M. **(B)** Quantification of Gata4<sup>+</sup> cells in the hearts of different ages. Three independent experiments are presented as mean+s.d.  $n = 3$ , \*  $p < 0.05$ ; \*\*\*  $p < 0.0001$  vs. 8 weeks. wks: weeks.

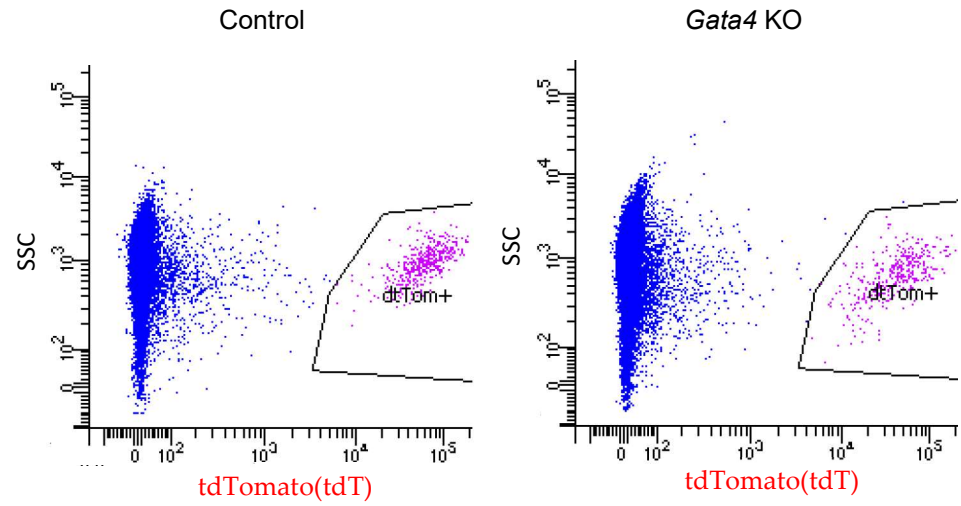

**Supplementary Figure S2.** Non-myocytes from *Tcf21<sup>Cre</sup>:R26<sup>RtdT</sup>* (Control) and *Tcf21<sup>Cre</sup>:Gata4<sup>fl/fl</sup>:R26<sup>RtdT</sup>* (*Gata4* KO) mice. A week after administering tamoxifen into *Tcf21<sup>iCre</sup>:R26<sup>RtdT</sup>* (Control) and *Tcf21<sup>iCre</sup>:Gata4<sup>fl/fl</sup>:R26<sup>RtdT</sup>* (*Gata4* KO) mice, non-myocytes isolated and sorted out tdTomato<sup>+</sup> cells using fluorescence-activated cell sorting (FACS).

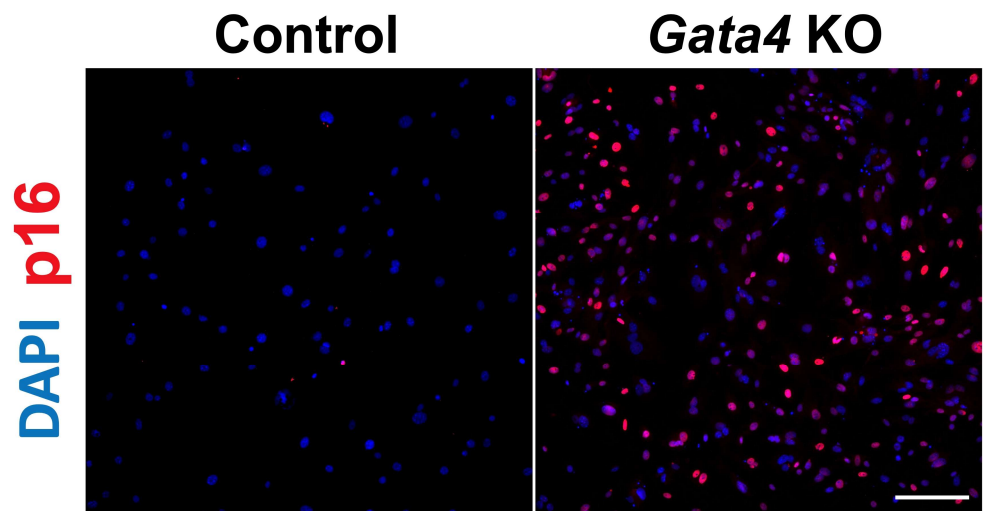

**Supplementary Figure S3.** Senescence induction in *Gata4* deficient cardiac fibroblasts in vitro. Demonstration of senescence in *Gata4* deficient cardiac fibroblasts. *Gata4*<sup>fl/fl</sup> cardiac fibroblasts infected with Ad-vector (Control) or Ad-Cre (*Gata4* KO) were immunostained for p16. Scale bar, 100  $\mu$ M.

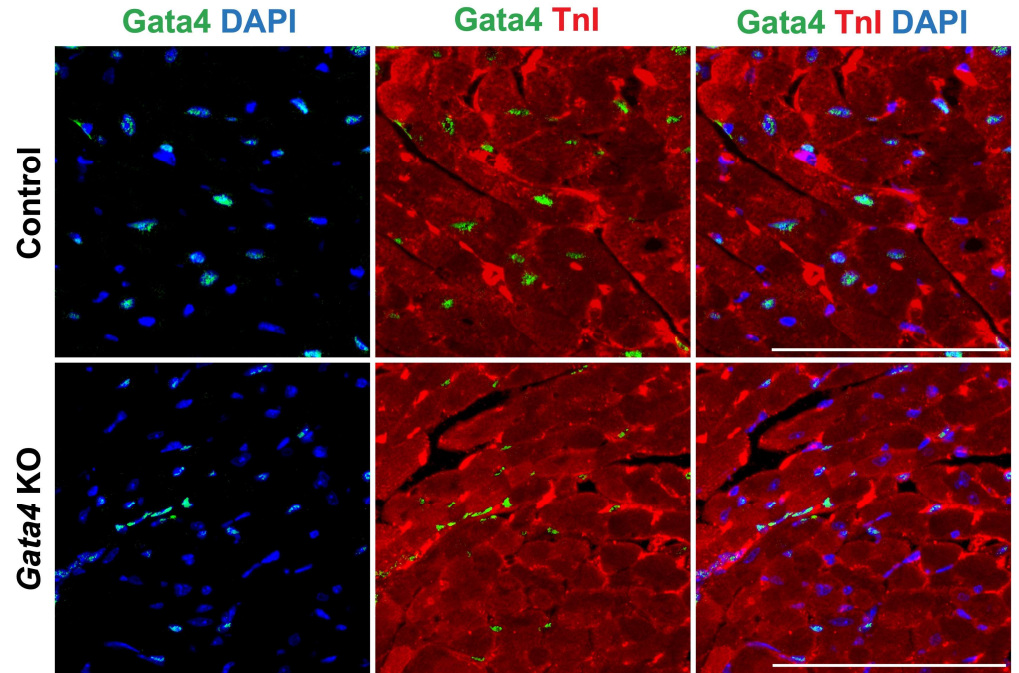

**Supplementary Figure S4.** Generation of cardiomyocyte-specific, inducible Gata4 KO mice. Immunofluorescent analysis to demonstrate Gata4 inactivation in  $\alpha MHC$  lineage traced cardiomyocytes. A week after tamoxifen administration,  $\alpha MHC^{iCre}$  (Control) and  $\alpha MHC^{iCre};Gata4^{fl/fl}$  (Gata4 KO) mouse hearts were harvested, and heart sections were processed. The heart sections were immunostained for Gata4 and stained for Troponin I (TnI) to demarcate Cardiomyocyte. White arrowheads indicate Gata4<sup>+</sup> cardiomyocytes. Scale bar, 100  $\mu$ M.

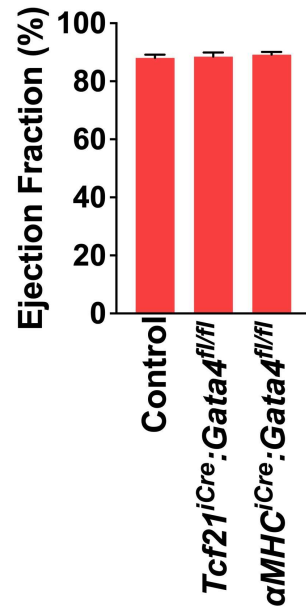

**Supplementary Figure S5.** *Tcf21<sup>iCre</sup>; Gata4<sup>fl/fl</sup>*, and *αMHC<sup>iCre</sup>;Gata4<sup>fl/fl</sup>* and WT mice were examined by transthoracic echocardiogram. One week after administering tamoxifen into *Tcf21<sup>iCre</sup>;Gata4<sup>fl/fl</sup>* and *αMHC<sup>iCre</sup>;Gata4<sup>fl/fl</sup>* and WT (Control) mice, ejection fraction was tested by using a transthoracic echocardiogram. Three independent experiments are presented as mean  $\pm$  s.d.  $n = 3$ .



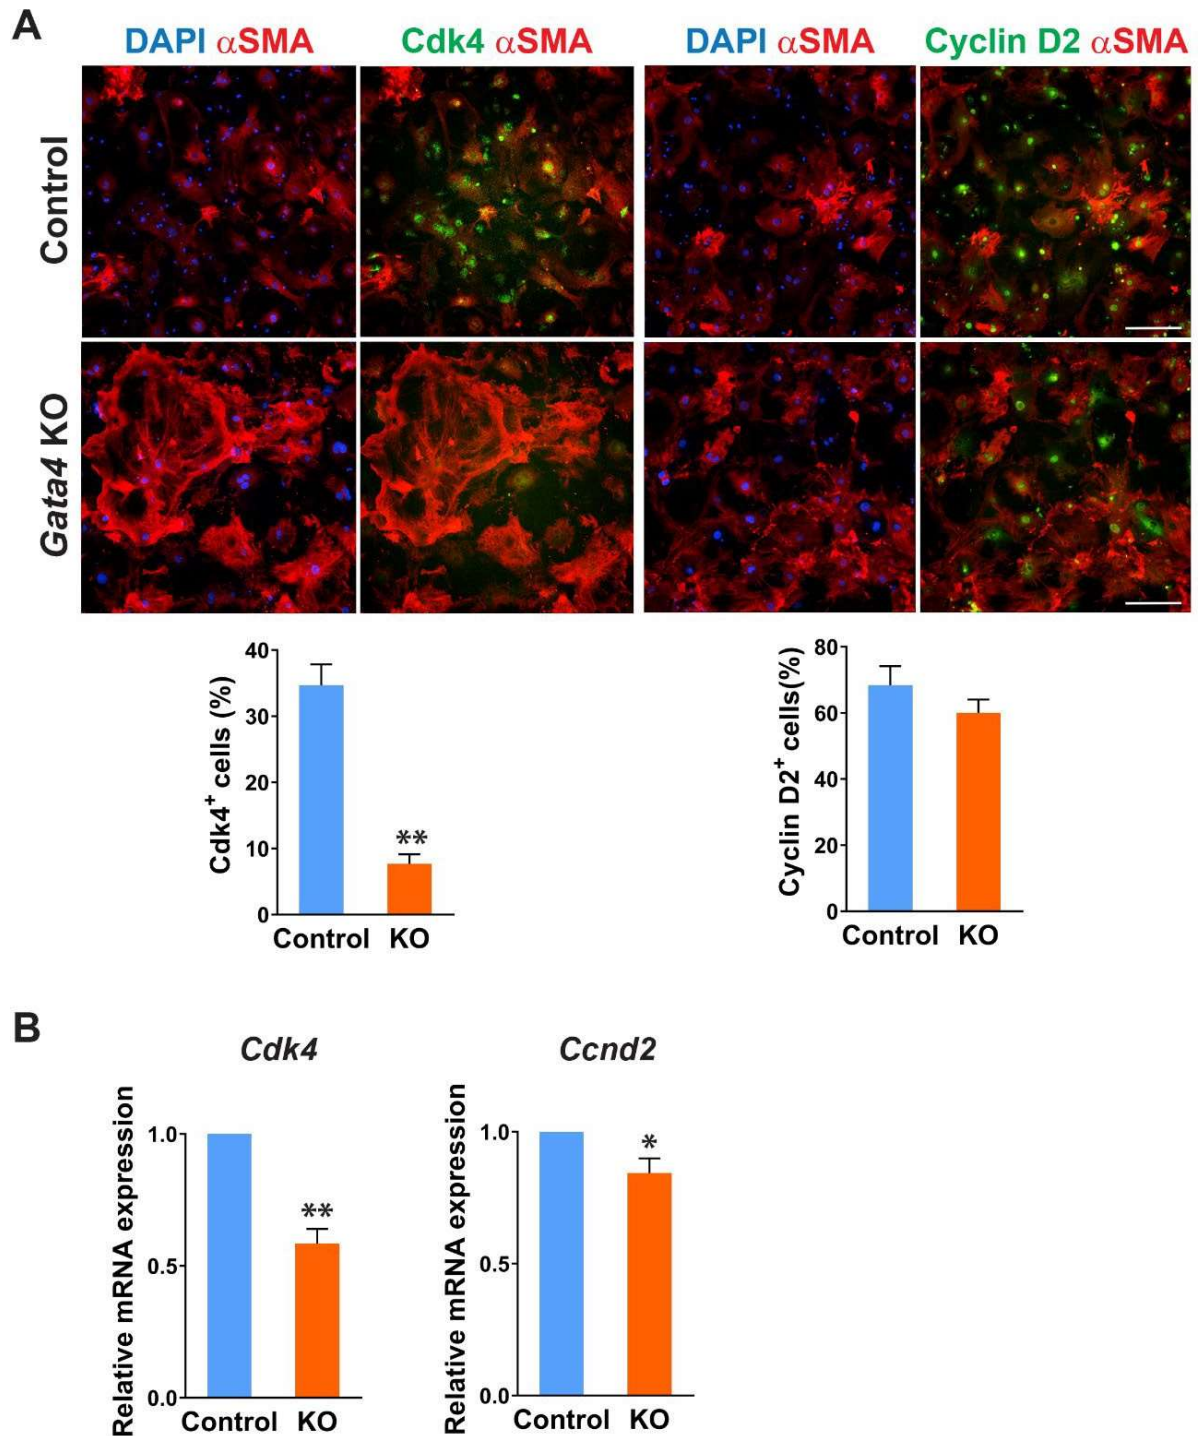

**Supplementary Figure S6.** Assessing expression levels of Cdk4 and Cyclin D2 following the loss of Gata4 in cardiac fibroblasts. **(A)** Ad-Cre or Ad-vector viruses were infected into cardiac fibroblasts isolated from *Gata4<sup>fl/fl</sup>* mice. Ten days later, the infected cells were immunostained for SMA and Cdk4 or Cyclin D2. Representative immunofluorescent images of cells infected with Ad-vector (control) or Ad-Cre (*Gata4* KO) were shown. Cdk4<sup>+</sup> or Cyclin D2<sup>+</sup> cells were quantified using high-content imaging analysis. Three independent experiments are presented as mean ± s.d. *n* = 3, \*\* *p* < 0.005. Scale bar, 200 μM. **(B)** qPCR analysis for mRNA levels of *Cdk4* and *Ccnd2* using sorted tdTomato<sup>+</sup> cells from *Tcf21<sup>iCre</sup>:R26R<sup>tdT</sup>* (control) and *Tcf21<sup>iCre</sup>:Gata4<sup>fl/fl</sup>:R26R<sup>tdT</sup>* (KO) mice. Three independent experiments are presented as mean ± s.d. *n* = 3, \* *p* < 0.05; *n* = 3, \*\* *p* < 0.005.

---

**Supplementary Table S1.** Sequence of primers used for RT-PCR studies.

| <b>Gene</b> | <b>Forward Primer (5'–3')</b> | <b>Reverse Primer (5'–3')</b> |
|-------------|-------------------------------|-------------------------------|
| Gata4       | CCCGAGGGAGCCGCCTACAC          | TGGGGTGTCTCCAGGGTTGG          |
| Cdk4        | ATGGCTGCCACTCGATATGAA         | TCCTCCATTAGGAACTCTCACAC       |
| Ccnd2       | GAGTGGGAACTGGTAGTGTTG         | CGCACAGAGCGATGAAGGT           |
| GAPDH       | CTCCCACTCTTCCACCTTCG          | CCACCACCCTGTTGCTGTAG          |
